# Supplementary material for: TiO 2 /CuWO 4 heterojunction photocatalyst in the preparation of cardiovascular chromeno[4,3- b ]chromene drugs
Source: Royal Society of Chemistry journal article supplement (doi:10.1039/d4ra07857h), 2024-01-01
Supplement: d4ra07857h1.pdf [file d4ra07857h1.pdf]

## Supporting Information

### **TiO<sub>2</sub>/CuWO<sub>4</sub> heterojunction photocatalyst in the preparation of cardiovascular chromeno[4,3-b]chromene drugs**

Jiaqi Sun, Jiahao Song

**Table S1.** Effects of different lights on reaction efficiency.

| Entry | Light               | TiO <sub>2</sub> /CuWO <sub>4</sub> (g) | Time (min) | Yield (%) |
|-------|---------------------|-----------------------------------------|------------|-----------|
| 1     | Xenon light, 1000 W | 0.012                                   | 30         | 93        |
| 2     | HP Hg, 200 W        | 0.012                                   | 30         | 92        |
| 3     | Green Laser, 537 nm | 0.012                                   | 30         | 98        |
| 4     | Dark                | 0.012                                   | 30         | 41        |

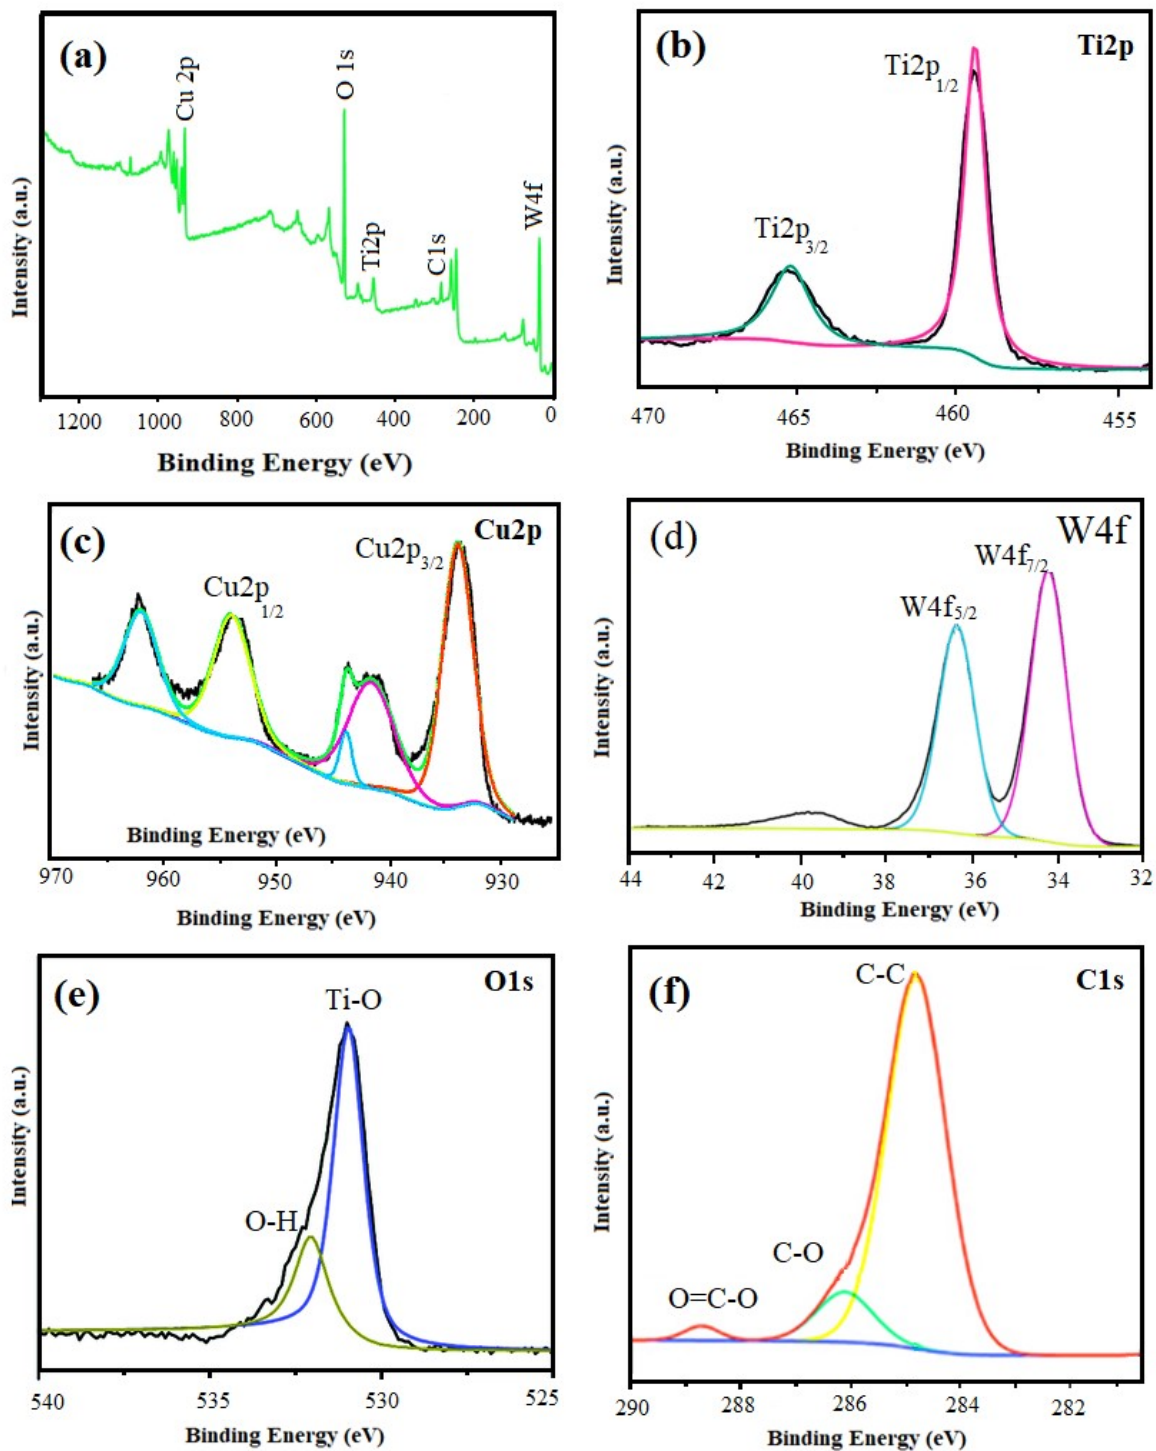

Fig. S1. XPS patterns of the synthesized  $\text{TiO}_2/\text{CuWO}_4$ . Survey spectrum (a); Ti 2p (b); Cu 2p (c); W 4f (d), O 1s (e) and C 1s (f) of the survey spectrum.

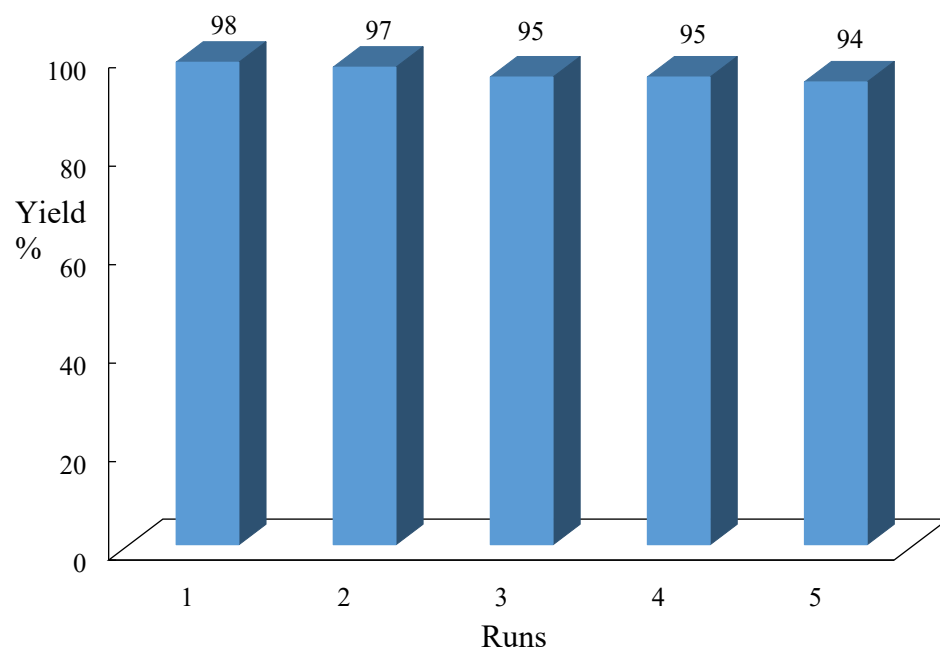

Fig. S2. Study of photocatalyst reusability.

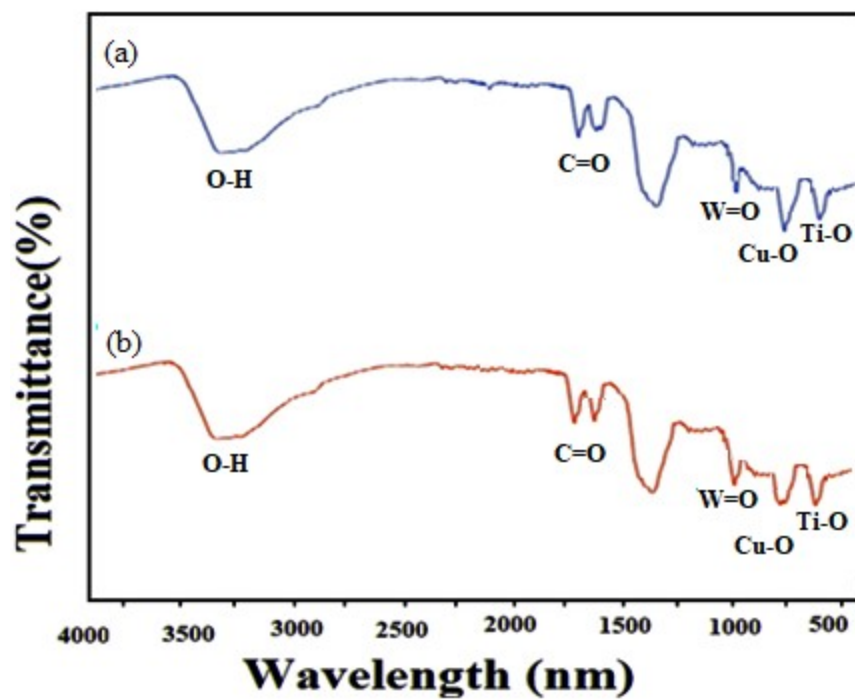

Fig. S3. FT-IR spectra of new (a) and regenerated (b)  $\text{TiO}_2/\text{CuWO}_4$ .
